# Supplementary material for: Engineering of PEDF-Expressing Primary Pigment Epithelial Cells by the SB Transposon System Delivered by pFAR4 Plasmids
Source: PubMed Central journal article supplement — Mol Ther Nucleic Acids. 2017 Feb 10;6:302–14. doi: 10.1016/j.omtn.2017.02.002 (PMC5363513; doi:10.1016/j.omtn.2017.02.002), 2017-02-10
Supplement: mmc1.pdf [file mmc1.pdf]

OMTN, Volume 6

## Supplemental Information

### Engineering of PEDF-Expressing Primary Pigment Epithelial Cells by the *SB* Transposon System Delivered by pFAR4 Plasmids

Gabriele Thumann, Nina Harmening, Cécile Prat-Souteyrand, Corinne Marie, Marie Pastor, Attila Sebe, Csaba Miskey, Laurence D. Hurst, Sabine Diarra, Martina Kropp, Peter Walter, Daniel Scherman, Zoltán Ivics, Zsuzsanna Izsvák, and Sandra Johnen

## Supplemental Figures and Legends

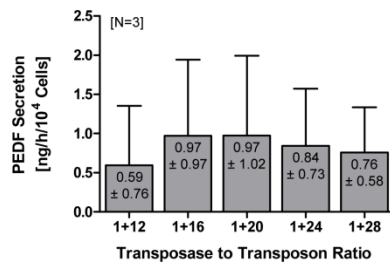

**Figure S1.** ELISA quantification of total PEDF secreted by primary human RPE cells transfected with varying ratios of SB100X transposase plasmid to PEDF transposon plasmid. For each donor sample, 2 transfections of  $1 \times 10^5$  cells with 0.038  $\mu\text{g}$  to 0.017  $\mu\text{g}$  pFAR4-CMV SB100X SV40 transposase and 0.462  $\mu\text{g}$  to 0.483  $\mu\text{g}$  pFAR4-ITRs CMV PEDF BGH plasmid DNA were carried out. PEDF secretion was analyzed in 3 human donor eyes (age:  $61.7 \pm 13.3$  years; gender: 2 males and 1 female; time postmortem:  $20.1 \pm 1.4$  hours; cultivation time before transfection:  $45.7 \pm 17.0$  days). Data are presented as mean  $\pm$  SD. Statistical analysis by one-way ANOVA with Bonferroni's Multiple Comparison Test showed no significant differences.

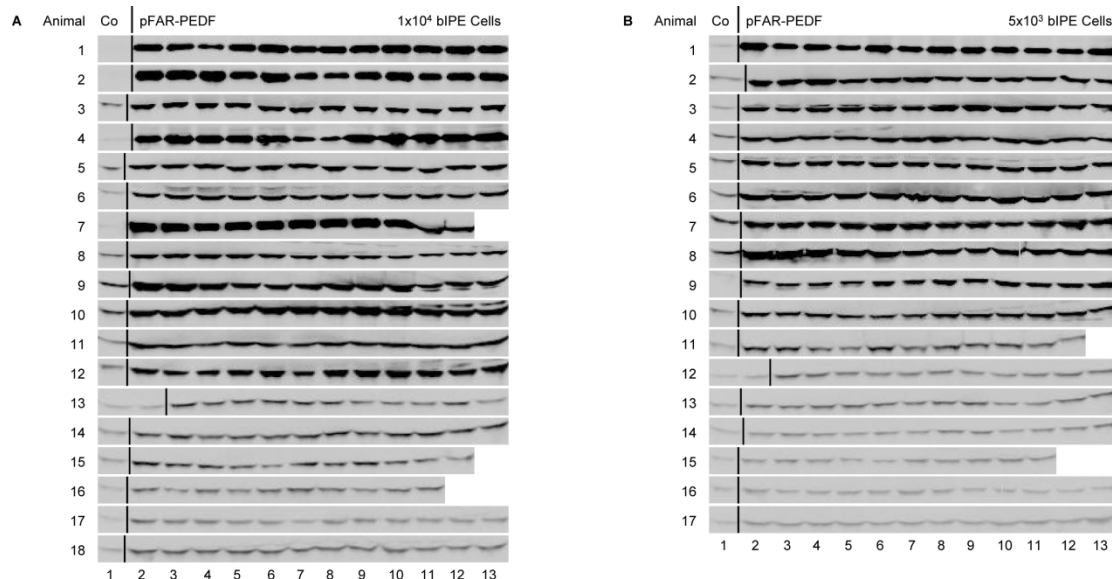

**Figure S2.** Western blot analysis of PEDF secretion by primary bovine IPE cells transfected with the pFAR4-ITRs CMV PEDF BGH transposon miniplasmid. Each analysis included 1 or 2 control transfections without the addition of miniplasmid DNA (column 1-2) and 10-12 transfections using 0.03  $\mu\text{g}$  pFAR4-CMV SB100X SV40 transposase and 0.47  $\mu\text{g}$  pFAR4-ITRs CMV PEDF BGH transposon miniplasmid DNA (columns 2/(3)-13). Culture supernatants were analyzed for total PEDF secretion using anti-PEDF antibodies 21 days after transfection. (A) Western blots of PEDF secreted by  $1 \times 10^4$  transfected IPE cells isolated from 18 bovine eyes (cultivation time before transfection:  $26.9 \pm 9.76$  days). (B) Western blots of PEDF secreted by  $5 \times 10^3$  transfected IPE cells isolated from 17 bovine eyes (cultivation time before transfection:  $27.9 \pm 13.6$  days). Note that the same exposure time was used for all chemiluminescence reactions.

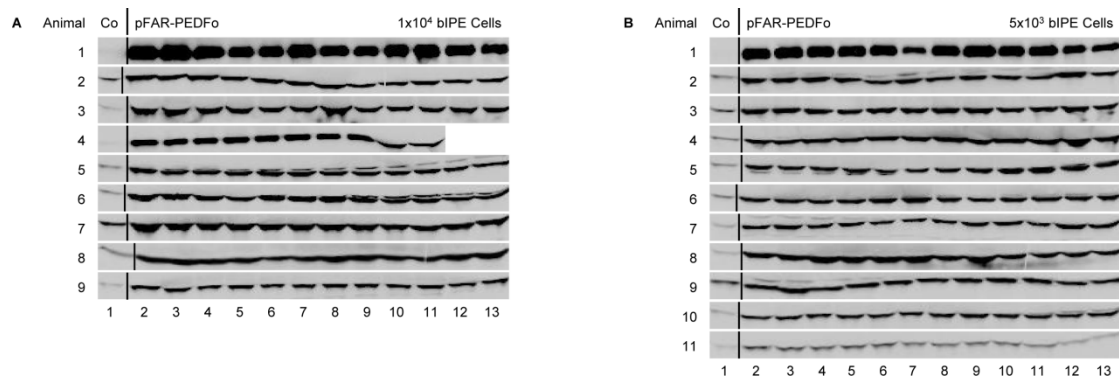

**Figure S3. Western blot analysis of PEDF secretion by primary bovine IPE cells transfected with the pFAR4-ITRs CMV PEDFOptimized BGH transposon miniplasmid.** Each analysis included 1 control transfection without the addition of miniplasmid DNA (column 1) and 10-12 transfections using 0.03  $\mu\text{g}$  pFAR4-CMV SB100X SV40 transposase and 0.47  $\mu\text{g}$  pFAR4-ITRs CMV PEDFOptimized BGH transposon miniplasmid DNA (columns 2-13). Culture supernatants were analyzed for total PEDF secretion using anti-PEDF antibodies 21 days after transfection. **(A)** Western blots of PEDF secreted by  $1 \times 10^4$  transfected IPE cells isolated from 9 bovine eyes (cultivation time before transfection:  $22.6 \pm 7.15$  days). **(B)** Western blots of PEDF secreted by  $5 \times 10^3$  transfected IPE cells isolated from 11 bovine eyes (cultivation time before transfection:  $29.2 \pm 15.2$  days). Note that the same exposure time was used for all chemiluminescence reactions.

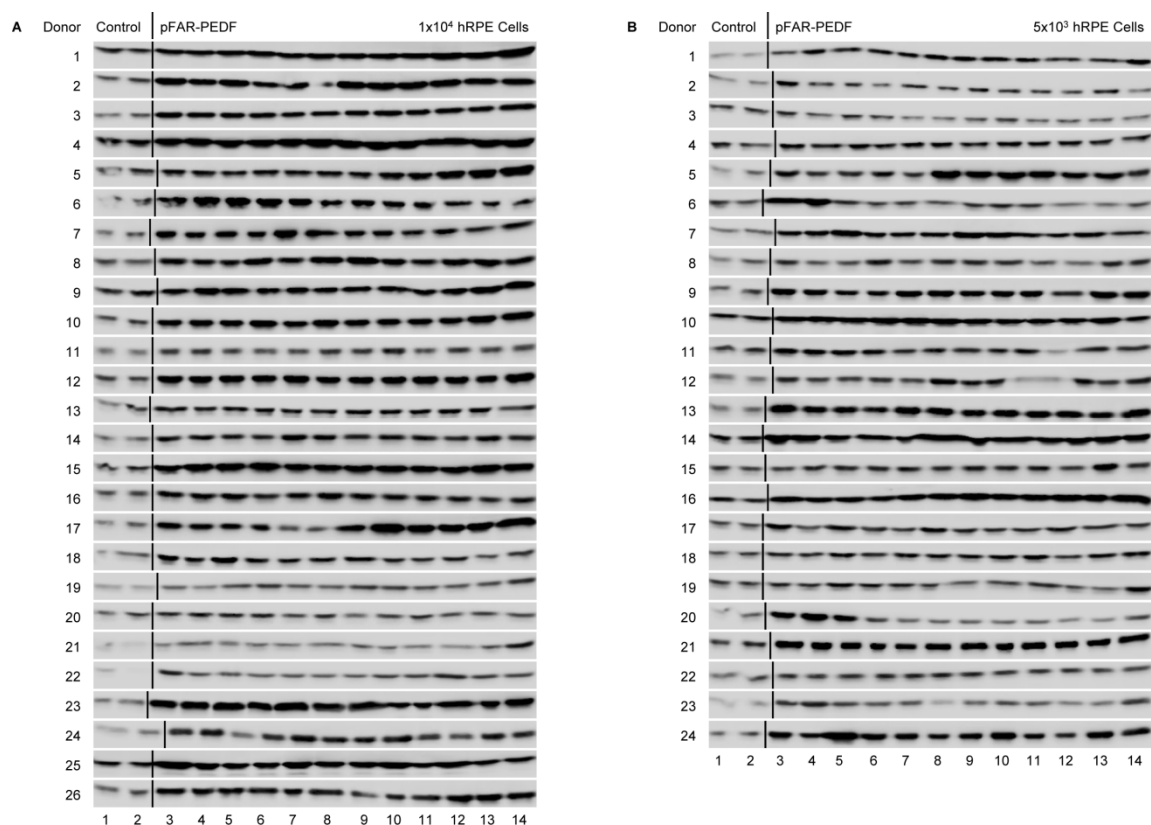

**Figure S4. Western blot analysis of PEDF secretion by primary human RPE cells transfected with the pFAR4-ITRs CMV PEDF BGH transposon miniplasmid.** Each analysis included 2 control transfections without the addition of miniplasmid DNA (columns 1-2) and 12 transfections using 0.03  $\mu\text{g}$  pFAR4-CMV SB100X SV40 transposase and 0.47  $\mu\text{g}$  pFAR4-ITRs CMV PEDF BGH transposon miniplasmid DNA (columns 3-14). Culture supernatants were analyzed for total PEDF secretion using anti-PEDF antibodies 21 days after transfection. **(A)** Western blots of PEDF secreted by  $1 \times 10^4$  transfected RPE cells isolated from 26 human donor eyes (age:  $67.5 \pm 12.0$  years; gender: 13 males and 13 females; time postmortem:  $31.7 \pm 14.4$  hours; cultivation time before transfection:  $42.0 \pm 14.4$  days). **(B)** Western blots of PEDF secreted by  $5 \times 10^3$  transfected RPE cells isolated from 24 human donor eyes (age:  $66.2 \pm 14.6$  years; gender: 14 males and 10 females; time postmortem:

32.9 ± 14.5 hours; cultivation time before transfection: 45.2 ± 15.8 days). Note that the same exposure time was used for all chemiluminescence reactions.

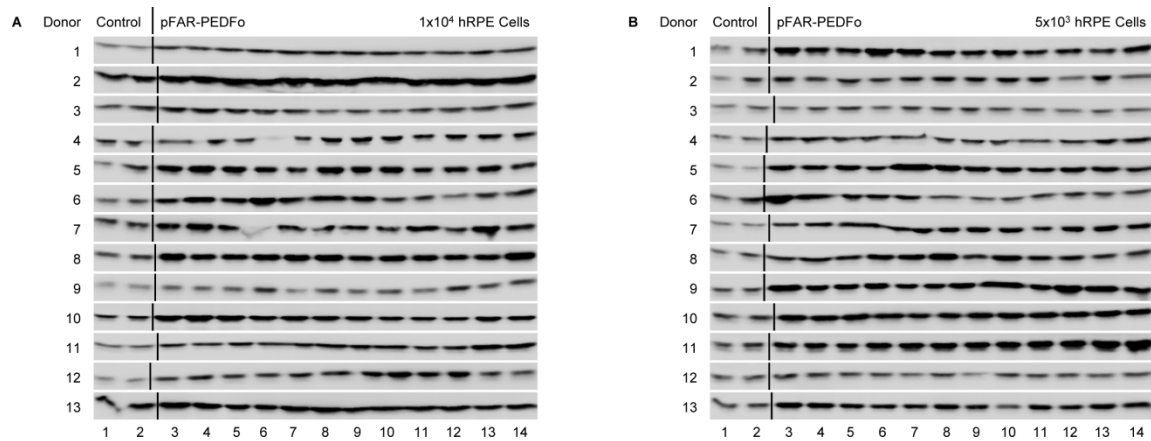

**Figure S5. Western blot analysis of PEDF secretion by primary human RPE cells transfected with the pFAR4-ITRs CMV PEDFOptimized BGH transposon miniplasmid.** Each analysis included 2 control transfections without the addition of miniplasmid DNA (columns 1-2) and 12 transfections using 0.03 µg pFAR4-CMV SB100X SV40 transposase and 0.47 µg pFAR4-ITRs CMV PEDFOptimized BGH transposon miniplasmid DNA (columns 3-14). Culture supernatants were analyzed for total PEDF secretion using anti-PEDF antibodies 21 days after transfection. **(A)** Western blots of PEDF secreted by 1x10<sup>4</sup> transfected RPE cells isolated from 13 human donor eyes (age: 61.1 ± 16.3 years; gender: 7 males and 6 females; time postmortem: 33.5 ± 16.2 hours; cultivation time before transfection: 39.8 ± 17.1 days). **(B)** Western blots of PEDF secreted by 5x10<sup>3</sup> transfected RPE cells isolated from 13 human donor eyes (age: 61.1 ± 16.3 years; gender: 8 males and 5 females; time postmortem: 32.5 ± 16.1 hours; cultivation time before transfection: 42.6 ± 18.6 days). Note that the same exposure time was used for all chemiluminescence reactions.

## Supplemental Tables

**Table S1. Western blot-based quantification of long-term PEDF secretion by primary bovine IPE cells after SB100X-mediated transfection.** Each analysis included 2 control transfections without the addition of miniplasmid DNA and 2 transfections using 0.03 µg pFAR4-CMV SB100X SV40 transposase and 0.47 µg pFAR4-ITRs CMV PEDF BGH or pFAR4-ITRs CMV PEDFoptimized BGH miniplasmid DNA. Culture supernatants were analyzed for total PEDF secretion at times from 5 to 20 weeks. Western blot signal intensities of PEDF-transfected and PEDFo-transfected cells were normalized to the signal intensities of the control cells. Using an unpaired two-tailed t test, a statistical difference was observed between control and transfected cells, but not between cells transfected with pFAR-PEDF and pFAR-PEDFo at any time period.

|                                        |            | Time<br>[Days] | N<br>[Samples] | Signal Intensities |           |                 | pFAR-PEDF versus<br>pFAR-PEDFo |
|----------------------------------------|------------|----------------|----------------|--------------------|-----------|-----------------|--------------------------------|
|                                        |            |                |                | Mean ± SD          | Range     |                 |                                |
| <b>1x10<sup>4</sup><br/>bIPE Cells</b> | Control    | 49 ± 1         | 18             | 1.00 ± 0.25        | 0.54-1.46 |                 |                                |
|                                        | pFAR-PEDF  |                |                | 19.9 ± 22.8        | 1.95-74.9 | **P=0.0013      |                                |
|                                        | pFAR-PEDFo |                |                | 17.1 ± 16.1        | 2.29-58.1 | ***P=0.0002     | Not significant                |
|                                        | Control    | 102 ± 9        | 18             | 1.00 ± 0.41        | 0.24-1.76 |                 |                                |
|                                        | pFAR-PEDF  |                |                | 17.4 ± 13.2        | 1.34-42.6 | ****P<0.0001    |                                |
|                                        | pFAR-PEDFo |                |                | 22.6 ± 18.8        | 0.89-58.5 | ****P<0.0001    | Not significant                |
| <b>1x10<sup>4</sup><br/>bIPE Cells</b> | Control    | 136 ± 10       | 18             | 1.00 ± 0.30        | 0.44-1.56 |                 |                                |
|                                        | pFAR-PEDF  |                |                | 15.2 ± 14.5        | 2.93-65.6 | ***P=0.0002     |                                |
|                                        | pFAR-PEDFo |                |                | 13.5 ± 8.74        | 2.98-29.7 | ****P<0.0001    | Not significant                |
|                                        | Control    | 221 ± 10       | 16             | 1.00 ± 0.36        | 0.30-1.70 |                 |                                |
|                                        | pFAR-PEDF  |                |                | 5.97 ± 4.20        | 1.16-18.4 | ****P<0.0001    |                                |
|                                        | pFAR-PEDFo |                |                | 6.00 ± 4.54        | 1.53-16.9 | ***P=0.0001     | Not significant                |
| <b>5x10<sup>3</sup><br/>bIPE Cells</b> | Control    | 365 ± 3        | 16             | 1.00 ± 0.24        | 0.49-1.51 |                 |                                |
|                                        | pFAR-PEDF  |                |                | 13.5 ± 23.7        | 0.50-73.8 | *P=0.0499       |                                |
|                                        | pFAR-PEDFo |                |                | 12.2 ± 22.1        | 0.19-76.3 | Not significant | Not significant                |
|                                        | Control    | 49 ± 1         | 11             | 1.00 ± 0.24        | 0.54-1.46 |                 |                                |
|                                        | pFAR-PEDF  |                |                | 15.2 ± 14.4        | 1.75-55.6 | ****P<0.0001    |                                |
|                                        | pFAR-PEDFo |                |                | 12.4 ± 12.5        | 1.28-57.0 | ****P<0.0001    | Not significant                |
| <b>5x10<sup>3</sup><br/>bIPE Cells</b> | Control    | 103 ± 9        | 11             | 1.00 ± 0.40        | 0.24-1.76 |                 |                                |
|                                        | pFAR-PEDF  |                |                | 13.9 ± 12.3        | 2.56-43.9 | ****P<0.0001    |                                |
|                                        | pFAR-PEDFo |                |                | 19.1 ± 17.3        | 1.00-50.6 | ****P<0.0001    | Not significant                |
|                                        | Control    | 136 ± 9        | 11             | 1.00 ± 0.29        | 0.44-1.56 |                 |                                |
|                                        | pFAR-PEDF  |                |                | 10.2 ± 6.87        | 2.08-25.1 | ****P<0.0001    |                                |
|                                        | pFAR-PEDFo |                |                | 8.60 ± 7.55        | 1.84-27.8 | ****P<0.0001    | Not significant                |
| <b>5x10<sup>3</sup><br/>bIPE Cells</b> | Control    | 221 ± 9        | 10             | 1.00 ± 0.33        | 0.30-1.70 |                 |                                |
|                                        | pFAR-PEDF  |                |                | 7.92 ± 7.18        | 1.09-30.2 | ***P=0.0001     |                                |
|                                        | pFAR-PEDFo |                |                | 7.88 ± 8.28        | 0.52-26.1 | ***P=0.0007     | Not significant                |
|                                        | Control    | 365 ± 3        | 10             | 1.00 ± 0.39        | 0.00-2.00 |                 |                                |
|                                        | pFAR-PEDF  |                |                | 8.64 ± 11.1        | 0.44-37.8 | **P=0.0040      |                                |
|                                        | pFAR-PEDFo |                |                | 8.79 ± 19.2        | 0.20-86.8 | Not significant | Not significant                |

**Table S2. Western blot-based quantification of long-term PEDF secretion in primary human RPE cells after SB100X-mediated transfection.** Each analysis included 2 control transfections without the addition of miniplasmid DNA and 2 transfections using 0.03 µg pFAR4-CMV SB100X SV40 transposase and 0.47 µg pFAR4-ITRs CMV PEDF BGH or pFAR4-ITRs CMV PEDFoptimized BGH miniplasmid DNA. Culture supernatants were analyzed for total PEDF secretion at the times indicated. Western blot signal intensities of PEDF-transfected and PEDFo-transfected cells were normalized to the signal intensities of the control cells. Statistical analysis by unpaired two-tailed t test showed a significant difference between transfected and non-transfected cells. No statistical significant difference was observed between cells transfected with pFAR-PEDF and pFAR-PEDFo for the first 110 days after transfection. However, at 160 days, a statistical significant decrease in PEDF secretion by pFAR-PEDF transfected cells compared to pFAR-PEDFo transfected cells was observed.

|                                 |            | Time<br>[Days] | N<br>[Samples] | Signal Intensities |                 |              | pFAR-PEDF versus<br>pFAR-PEDFo |
|---------------------------------|------------|----------------|----------------|--------------------|-----------------|--------------|--------------------------------|
|                                 |            |                |                | Mean ± SD          | Range           |              |                                |
| 1x10 <sup>4</sup><br>hRPE Cells | Control    | 31 ± 5         | 10             | 1.00 ± 0.15        | 0.74-1.26       |              |                                |
|                                 | pFAR-PEDF  |                |                | 6.36 ± 3.27        | 2.08-11.3       | ****P<0.0001 |                                |
|                                 | Control    | 27 ± 1         | 4              | 1.00 ± 0.22        | 0.73-1.27       |              |                                |
|                                 | pFAR-PEDFo |                |                | 10.7 ± 4.86        | 5.07-16.7       | **P=0.0071   | Not significant                |
|                                 | Control    | 61 ± 10        | 30             | 1.00 ± 0.25        | 0.56-1.44       |              |                                |
|                                 | pFAR-PEDF  |                |                | 6.03 ± 4.57        | 0.93-19.3       | ****P<0.0001 |                                |
|                                 | Control    | 64 ± 8         | 14             | 1.00 ± 0.27        | 0.61-1.39       |              |                                |
|                                 | pFAR-PEDFo |                |                | 8.07 ± 4.14        | 1.71-15.5       | ****P<0.0001 | Not significant                |
|                                 | Control    | 107 ± 8        | 30             | 1.00 ± 0.24        | 0.43-1.57       |              |                                |
|                                 | pFAR-PEDF  |                |                | 6.84 ± 7.03        | 0.41-27.1       | ****P<0.0001 |                                |
|                                 | Control    | 108 ± 7        | 14             | 1.00 ± 0.23        | 0.51-1.49       |              |                                |
|                                 | pFAR-PEDFo |                |                | 8.13 ± 4.98        | 1.13-15.5       | ****P<0.0001 | Not significant                |
|                                 | Control    | 162 ± 14       | 20             | 1.00 ± 0.15        | 0.75-1.25       |              |                                |
|                                 | pFAR-PEDF  |                |                | 2.51 ± 1.72        | 0.34-6.03       | ***P=0.0004  |                                |
| Control                         | 154 ± 4    | 8              | 1.00 ± 0.17    | 0.76-1.24          |                 |              |                                |
| pFAR-PEDFo                      |            |                | 4.83 ± 2.49    | 1.66-8.12          | ***P=0.0007     | **P=0.0098   |                                |
| Control                         | 215 ± 20   | 10             | 1.00 ± 0.10    | 0.85-1.15          |                 |              |                                |
| pFAR-PEDF                       |            |                | 2.61 ± 2.12    | 0.78-7.33          | *P=0.0278       |              |                                |
| Control                         | 193 ± 0    | 2              | 1.00 ± 0.08    | 0.94-1.06          |                 |              |                                |
| pFAR-PEDFo                      |            |                | 8.10 ± 3.92    | 5.32-10.9          | Not significant | *P=0.0135    |                                |
| 5x10 <sup>3</sup><br>hRPE Cells | Control    | 33 ± 5         | 14             | 1.00 ± 0.24        | 0.65-1.35       |              |                                |
|                                 | pFAR-PEDF  |                |                | 7.51 ± 4.84        | 2.13-19.4       | ****P<0.0001 |                                |
|                                 | Control    | 31 ± 6         | 8              | 1.00 ± 0.28        | 0.65-1.35       |              |                                |
|                                 | pFAR-PEDFo |                |                | 6.88 ± 4.86        | 3.30-16.7       | **P=0.0042   | Not significant                |
|                                 | Control    | 62 ± 12        | 30             | 1.00 ± 0.23        | 0.56-1.44       |              |                                |
|                                 | pFAR-PEDF  |                |                | 7.29 ± 6.92        | 1.70-33.2       | ****P<0.0001 |                                |
|                                 | Control    | 64 ± 13        | 20             | 1.00 ± 0.19        | 0.76-1.24       |              |                                |
|                                 | pFAR-PEDFo |                |                | 4.79 ± 2.75        | 0.81-10.7       | ****P<0.0001 | Not significant                |
|                                 | Control    | 109 ± 10       | 26             | 1.00 ± 0.23        | 0.55-1.45       |              |                                |
|                                 | pFAR-PEDF  |                |                | 8.66 ± 11.4        | 1.32-55.8       | **P=0.0012   |                                |
|                                 | Control    | 111 ± 11       | 16             | 1.00 ± 0.17        | 0.75-1.25       |              |                                |
|                                 | pFAR-PEDFo |                |                | 8.47 ± 8.03        | 0.98-26.7       | ***P=0.0008  | Not significant                |
|                                 | Control    | 162 ± 18       | 20             | 1.00 ± 0.25        | 0.56-1.44       |              |                                |
|                                 | pFAR-PEDF  |                |                | 3.20 ± 2.01        | 0.73-7.79       | ****P<0.0001 |                                |
| Control                         | 153 ± 12   | 10             | 1.00 ± 0.29    | 0.56-1.44          |                 |              |                                |
| pFAR-PEDFo                      |            |                | 7.33 ± 7.90    | 1.35-23.8          | *P=0.0208       | *P=0.0379    |                                |
| Control                         | 216 ± 20   | 12             | 1.00 ± 0.40    | 0.43-1.57          |                 |              |                                |
| pFAR-PEDF                       |            |                | 2.87 ± 2.02    | 0.63-6.61          | **P=0.0048      |              |                                |
| Control                         | 201 ± 11   | 4              | 1.00 ± 0.47    | 0.43-1.57          |                 |              |                                |
| pFAR-PEDFo                      |            |                | 7.53 ± 1.32    | 6.33-9.40          | ****P<0.0001    | ***P=0.0010  |                                |

**Table S3. Primer sequences for integration site profiling of the pFAR4-ITRs CMV PEDF BGH transposon in human RPE cells.**

|                        |                                                                                                                                      |
|------------------------|--------------------------------------------------------------------------------------------------------------------------------------|
| <b>SB_20_hmr</b>       | AACTTAAGTGTATGTAAACTTCCGACT                                                                                                          |
| <b>4mer primers</b>    |                                                                                                                                      |
| <b>atcc_asPE</b>       | GTGACTGGAGTTCAGACGTGTGCTCTTCCGATCTHNNNNNatcc                                                                                         |
| <b>ggat_asPE</b>       | GTGACTGGAGTTCAGACGTGTGCTCTTCCGATCTBBNNNnggat                                                                                         |
| <b>gaca_asPE</b>       | GGACTGGAGTTCAGACGTGTGCTCTTCCGATCTVVVNNNgaca                                                                                          |
| <b>gcaa_asPE</b>       | GTGACTGGAGTTCAGACGTGTGCTCTTCCGATCTVNVNVNgcaa                                                                                         |
| <b>tgte_asPE</b>       | GTGACTGGAGTTCAGACGTGTGCTCTTCCGATCTHHNNNtgte                                                                                          |
| <b>ttgc_asPE</b>       | GTGACTGGAGTTCAGACGTGTGCTCTTCCGATCTHHNNNttgc                                                                                          |
| <b>SB-7</b>            | cttAAGTGTATGTAAACTTCCGACTTCA                                                                                                         |
| <b>PE_first</b>        | Gtgactggagttcagacgtg                                                                                                                 |
| <b>SB_PE_noTA_BC_1</b> | ACACTCTTCCCTACACGACGCTCTTCCGATCTATCACGatGTAAACTTCCGACTTCAACTG                                                                        |
| <b>SB_PE_noTA_BC_2</b> | ACACTCTTCCCTACACGACGCTCTTCCGATCTCGATGTatGTAAACTTCCGACTTCAACTG                                                                        |
| <b>SB_PE_noTA_BC_3</b> | ACACTCTTCCCTACACGACGCTCTTCCGATCTTTAGGCatGTAAACTTCCGACTTCAACTG                                                                        |
| <b>SB_PE_noTA_BC_4</b> | ACACTCTTCCCTACACGACGCTCTTCCGATCTTGACCAatGTAAACTTCCGACTTCAACTG                                                                        |
| <b>PE nest</b>         | CAAGCAGAAGACGGCATAACGAGAT_reverse_complement_of_Illumina_Truseq_barcode_GTGACTGG<br>AGTTCAGACGTGTGCTCTTCCGATCT                       |
| <b>Illumina 1</b>      | AATGATACGGCGACCACCGAGATCTACACTCTTCCCTACACGACGCTCTTCCGATCT<br>Oligonucleotide sequences© 2006-2010 Illumina, Inc All rights reserved. |
